# Supplementary material
Source: PubMed Central journal article supplement (PMC7594101)

This is only a preview of the survey. Responses will not be saved. [Close](#)

# Literature Review: IPE with Health Professions Students

Pa

Literature Review Study Purpose and Inclusion Criteria:

## PURPOSE

1. To examine training models commonly reported in the literature pertaining to the development and implementation of interprofessional education involving a diverse range of health sciences students.
2. To identify specific educational components critical to the effectiveness of interprofessional education, such as strategies for leadership buy-in, curriculum structure, curriculum content, methods of facilitating interprofessional interactions, faculty recruitment, faculty skill building, faculty retention, institutional financial support.

## INCLUSION CRITERIA

1) an interprofessional mix of students; 2) student-student interactions; 3) qualitative or quantitative evidence leading to programmatic improvement were retained for detailed review and data extraction.

## STUDY PROFILE

### Q 1.

Your Name

Required.

### Q 2.

Coding Date

Required.

### Q 3.

Article Code (First Author's Last Name, Publication Year)

**Q 4.**Article Title  

---

**Q 5.**University affiliation (of first author):  

---

**Q 6.**Publishing Journal  

---

**Q 7.**

Publication Year

**Required.** 2010 2009 2008 2007 2006 2005 Other: **Q 8.**

Country where study was conducted.

 US UK (England, Wales, Scotland, Ireland) Canada Germany Netherlands Australia

Other: \_\_\_\_\_

**Q 9.**

Multiple institutional research (e.g. Data collected from students from multiple institutions)

- Yes  
 No  
 Unclear

**Q 10.**

Select the term(s) that is the focus of this study.

- Interprofessional  
 Interdisciplinary  
 Transprofessional  
 Multi-disciplinary  
 Multi-professional  
 Other: \_\_\_\_\_

**Q 11.**

How do the authors define the term(s) you selected above?

---

**Q 12.**

Purpose of Study (Describe briefly)

Required.

**Q 13.**

Type of Study

Required.

- Quantitative
- Qualitative
- Mixed Method
- Other:

**Q 14.**

Random assignment of students to study conditions?

- Yes
- No

**Q 15.**

Study Setting (check all that apply)

- academic
- patient's home
- retirement/assisted living
- inpatient
- outpatient/ambulatory
- community
- other (write in):

**CHARACTERISTICS OF EDUCATIONAL INTERVENTION/PROGRAM DESCRIBED****Q 16.**

Educational intervention/program part of local, regional, national IPE strategy? (check all that

- local
- regional
- national
- unclear
- Other:

**Q 17.**

Educational intervention/program a required or elective in the curriculum?

Required

Elective

Extracurricular

Not Described

Other: \_\_\_\_\_

**Q 18.**

Do students earn credit for taking the course or participating in the educational program?

no

If yes, how many credits?: \_\_\_\_\_

**Q 19.**

If grades are assigned to students, describe the method:

\_\_\_\_\_

**Q 20.**

Educational intervention/program developed based on a theoretical or conceptual framework?

No

If yes, describe: \_\_\_\_\_

**Q 21.**

Describe the educational intervention/program.

\_\_\_\_\_

**Q 22.**

Do the authors report ways in which interprofessional trainees and staff interact with each other?

- Yes
- No
- If yes, describe:

**Q 23.**

Length of time educational intervention/program has been implemented?

- Less than 1 year
- 1-5 years
- 6-10 years
- Over 10 years

**Q 24.**

How long does the educational intervention/program (e.g. course) last at a given time?

- 1 week
- 1 month
- 1 quarter/semester
- Other:

**Q 25.**

How frequently does the educational intervention/program (e.g. course) take place?

- Every week
- Every month
- Every quarter/semester
- Every year
- One time activity
- If one time activity, describe:

**Q 26.**

Timing of educational intervention/program (e.g. first year medical school curriculum)

**Q 27.**

Is there a formal application process in place for accepting students in the course or education program?

no

If yes, describe: |

**Q 28.**

Developers of educational intervention/program:

Students

Faculty

Patients & Families

Other: |

**Q 29.**

Teaching methods used in the educational intervention or program.

Large Group Lecture

Case-Based/problem-based small group discussion

Workshops

Reflective Exercises

Written Assignments

Shadowing of Clinical Providers

Shodowing of students

Self-paced e-learning

Clinical Teaching/ Direct interaction with patients

Simulation

Case analysis based on patients

Community-based projects

Other: |

**STUDENTS****Q 30.**

Describe target trainees' number and disciplines:

---

**Q 31.**

Demographic information collected from trainees:

- Age
- Gender
- Ethnicity
- Prior Exposure to IPE
- Describe selected items: |

**FACULTY ROLES AND RESPONSIBILITIES****Q 32.**

Describe faculty participants (e.g. disciplines, titles, number, prior training in interprofessional education, other)

---

**Q 33.**

Faculty recruitment strategies

- Voluntary
- Assigned
- Marketing
- Incentives
- Not described
- Other: |



**Q 34.**

Faculty development offered to faculty for improving their IPE skills.

- IPE content
- Teaching methods (e.g. lecture, PBL)
- e-Learning-based faculty development
- Simulation teaching skills
- Other: \_\_\_\_\_

**Q 35.**

Do authors report strategies for retaining IPE faculty?

- No, not reported
- If yes, describe: \_\_\_\_\_

**OUTCOME MEASURES****Q 36.**

Select outcomes reported in the study (check all that apply)

- Knowledge
- Attitude
- Satisfaction
- Skills
- Behaviors
- Application of skills learned
- Patient-oriented outcomes
- Other: \_\_\_\_\_

**Q 37.**

Describe the outcomes you selected above:

**Q 38.**

Select assessment measures reported in the study (check all that apply):

- Knowledge test
- Attitude/Perception survey
- Skill performance ratings
- Individual/group debriefing
- Interviews/focus group
- Other:

**Q 39.**

Describe the assessment measures you selected above. Provide names of instrument, if available.

**Q 40.**

Describe key results as they relate to interprofessional education

---

**Q 41.**

Reliability of assessment instruments reported?

- No
- If yes, describe

**Q 42.**

Validity of interview scoring instrument reported (e.g. content validity):

No

If yes, describe:

**Q 43.**

Select any scholarly outputs/institutional legacy resulting from IPE innovation as reported in the reviewed study:

Interprofessional Education Day implemented

Publications

Changes in curriculum

New staff/faculty positions dedicated to IPE

New courses implemented

Other:

**OTHER INFORMATION**

**Q 44.**

Administrative Support Model (check all that are described)

Leadership buy-in

Staff

Office space dedicated to interprofessional education

Technology support

Financial support (institutional support, grant support, combination, other models)

Other:

**Q 45.**

Describe the administrative support model you selected in the previous question.

---

**Q 46.**

Key barriers and challenges reported in study:

- Scheduling
- Funding
- Administrative support
- Other: \_\_\_\_\_

**Q 47.**

Areas of further work reported in study:

**Q 48.**

List highlights, innovations and unique features in interprofessional education reported in this :

---

**Please scan the references in the study and mark any potentially useful articles for u review.**

**Q 49.**

Comments

---

[Review >>](#)

**Questions or Comments?**

Contact Erin Abu-Rish at [erin2@u.washington.edu](mailto:erin2@u.washington.edu)

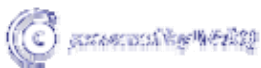

Supplement: NIHMS1638587-supplement-Appendix_A.pdf [file NIHMS1638587-supplement-Appendix_A.pdf]
