# Supplementary material
Source: PubMed Central journal article supplement (PMC7594101)
Supplement: NIHMS1638587-supplement-Appendix_G.pdf [file NIHMS1638587-supplement-Appendix_G.pdf]

## **RIPE: A Tool to Improve Replicability of Interprofessional Education Interventions**

This tool outlines important elements of interprofessional education interventions and should be used to structure reporting of preparation, activities, and outcomes. Describing your project and reporting your findings in a standardized manner will facilitate comparison and increase replicability of studies.

| <b>Item No.</b> | <b>Section/Topic</b>                     | <b>Item</b>                                                                                                                                                                       | <b>Check or N/A</b> |
|-----------------|------------------------------------------|-----------------------------------------------------------------------------------------------------------------------------------------------------------------------------------|---------------------|
| <b>1</b>        | <b>Title and Abstract</b>                | Structured summary of IPE intervention design, methods, results, and conclusions                                                                                                  | 1                   |
| <b>2</b>        |                                          | <b>Introduction</b>                                                                                                                                                               |                     |
| <b>2a</b>       | Background and Objectives                | Scientific background and explanation of rationale for IPE intervention (including conceptual or theoretical framework)                                                           | 2                   |
| <b>2b</b>       |                                          | Specific objectives or hypotheses of IPE intervention                                                                                                                             | 3                   |
| <b>2c</b>       |                                          | Targeted IPE competencies/outcomes identified (e.g. mapped to objectives)                                                                                                         | 4                   |
| <b>3</b>        |                                          | <b>Intervention Methods</b>                                                                                                                                                       |                     |
| <b>3a</b>       | Detailed Description of IPE intervention | Intervention Developers (e.g. one person, team, etc.)                                                                                                                             | 5                   |
| <b>3b</b>       |                                          | Teaching Strategies (e.g. small group discussion, lecture, simulation, etc.)                                                                                                      | 6                   |
| <b>3c</b>       |                                          | Settings and locations where intervention carried out (e.g. classroom, simulation labs, clinical settings, etc.)                                                                  | 7                   |
| <b>3d</b>       |                                          | Method of assignment of student (e.g. all in same group vs. randomization)                                                                                                        | 8                   |
| <b>3e</b>       |                                          | Important changes to IPE intervention plans after initiation of training?                                                                                                         | 9                   |
| <b>3f</b>       |                                          | Duration of the IPE Intervention (time: # of hours, weeks, etc.)                                                                                                                  | 10                  |
| <b>3g</b>       |                                          | Frequency of occurrence of the IPE intervention (monthly, each quarter or semester, & annually)                                                                                   | 11                  |
| <b>3h</b>       |                                          | Course type (e.g. required stand-alone experience, required but part of existing course/curriculum, not required (but receive academic credit), not required (no academic credit) | 12                  |
| <b>3i</b>       | Faculty Participants                     | Faculty participant characteristics: disciplines, numbers, and type (e.g. clinical vs. academic)                                                                                  | 13                  |
| <b>3j</b>       | Student Participants                     | Student participant characteristics: disciplines, numbers, and type                                                                                                               | 14                  |
| <b>3k</b>       | Institutional Participants               | Number and type of institutions/professions                                                                                                                                       | 15                  |
| <b>3l</b>       | Other Information                        | Partnerships (e.g. community, practice, etc.)                                                                                                                                     | 16                  |

|           |                       |                                                                                                                                                                                                              |    |
|-----------|-----------------------|--------------------------------------------------------------------------------------------------------------------------------------------------------------------------------------------------------------|----|
| <b>4</b>  |                       | <b>Implementation Methods</b>                                                                                                                                                                                |    |
| <b>4a</b> | Faculty               | Faculty Recruitment Strategies                                                                                                                                                                               | 17 |
| <b>4b</b> |                       | Faculty Development to Prepare for Intervention Facilitation                                                                                                                                                 | 18 |
| <b>4c</b> |                       | Faculty Retainment Strategies                                                                                                                                                                                | 19 |
| <b>4d</b> | Students              | How students recruited                                                                                                                                                                                       | 20 |
| <b>4e</b> |                       | How students retained                                                                                                                                                                                        | 21 |
| <b>4f</b> | Resources             | Funding Source (external, internal, etc.)                                                                                                                                                                    | 22 |
| <b>4g</b> |                       | Description of resources utilized to implement the intervention (e.g. costs and staff hours)                                                                                                                 | 23 |
| <b>4h</b> |                       | Description of Institutional/Leadership Support (e.g. institutional directive, office/classroom space, staff, supplies, etc.)                                                                                | 24 |
| <b>4i</b> | Educational Materials | Educational Materials Distributed to Students (e.g. appendices or online resources).                                                                                                                         | 25 |
| <b>4j</b> |                       | Preparatory Materials Distributed to Faculty (e.g. appendices and/or online resources).                                                                                                                      | 26 |
| <b>4k</b> |                       | Presentation Materials (best if available for review, sharing, etc.) or online resources available.                                                                                                          | 27 |
| <b>4l</b> |                       | Equipment and supplies required for intervention                                                                                                                                                             | 28 |
| <b>5</b>  |                       | <b>Outcomes</b>                                                                                                                                                                                              |    |
| <b>5a</b> |                       | Outcomes defined and pre-specified including how and when they were measured (e.g. attitudes, knowledge, satisfaction, skills, patient oriented outcomes, etc.)                                              | 29 |
| <b>5b</b> |                       | Assessment measures defined and described (including names of tools and how/when utilized) whether they were validated (surveys, debriefs, program evaluation, tests, performance observation/ratings, etc.) | 30 |
| <b>5c</b> |                       | Any changes to study outcomes after the study started, with reasons.                                                                                                                                         | 31 |
| <b>5d</b> |                       | Findings Described                                                                                                                                                                                           | 32 |
| <b>6</b>  |                       | <b>Discussion</b>                                                                                                                                                                                            |    |
| <b>6a</b> |                       | Barriers to Intervention                                                                                                                                                                                     | 33 |
| <b>6b</b> |                       | Supports of Intervention                                                                                                                                                                                     | 34 |
| <b>6c</b> |                       | Lessons Learned                                                                                                                                                                                              | 35 |
| <b>6d</b> |                       | Discretionary/Adaptable Components of Program (e.g. can some modules stand alone?)                                                                                                                           | 36 |
| <b>6e</b> | Accessibility         | Program Consultation/Technical Support/References Given for More Information (e.g. website, online technical paper)                                                                                          | 37 |
